# Supplementary material for: Antimicrobial and fluorescence finishing of woolen yarn with Terminalia arjuna natural dye as an ecofriendly substitute to synthetic antibacterial agents
Source: Royal Society of Chemistry journal article supplement (doi:10.1039/c6ra02717b), 2016-01-01

### Supplementary Information

Fig. 1. Percentage microbial reduction as a function of time for 5% (o.w.f.) ferrous sulfate mordanted woolen yarn

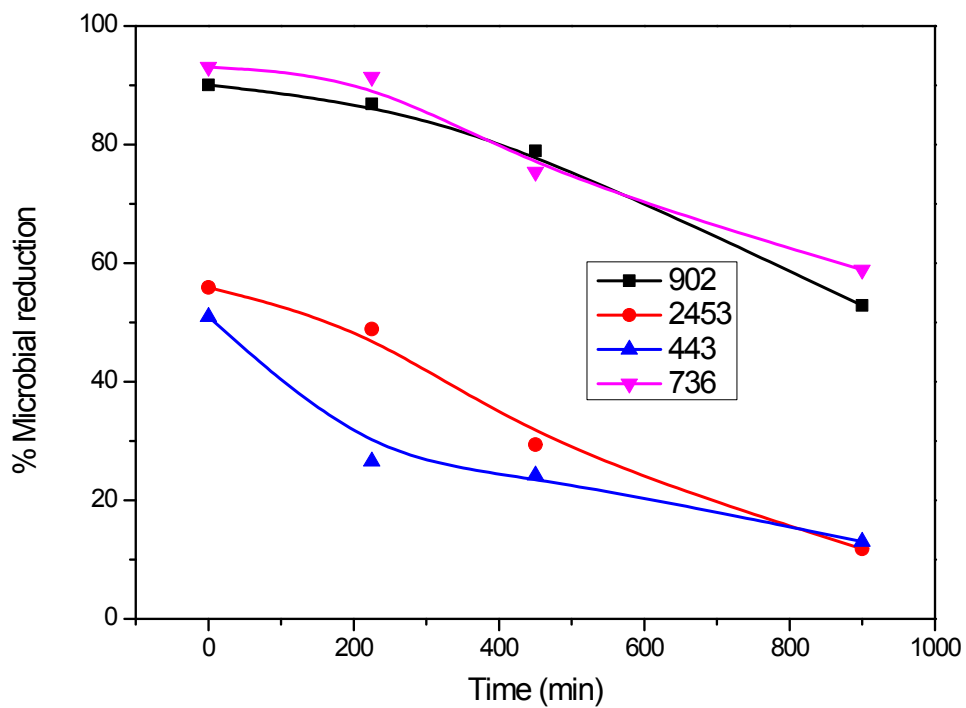

Fig. 2. Percentage microbial reduction as a function of time for 1% (o.w.f.) stannous chloride mordanted woolen yarn

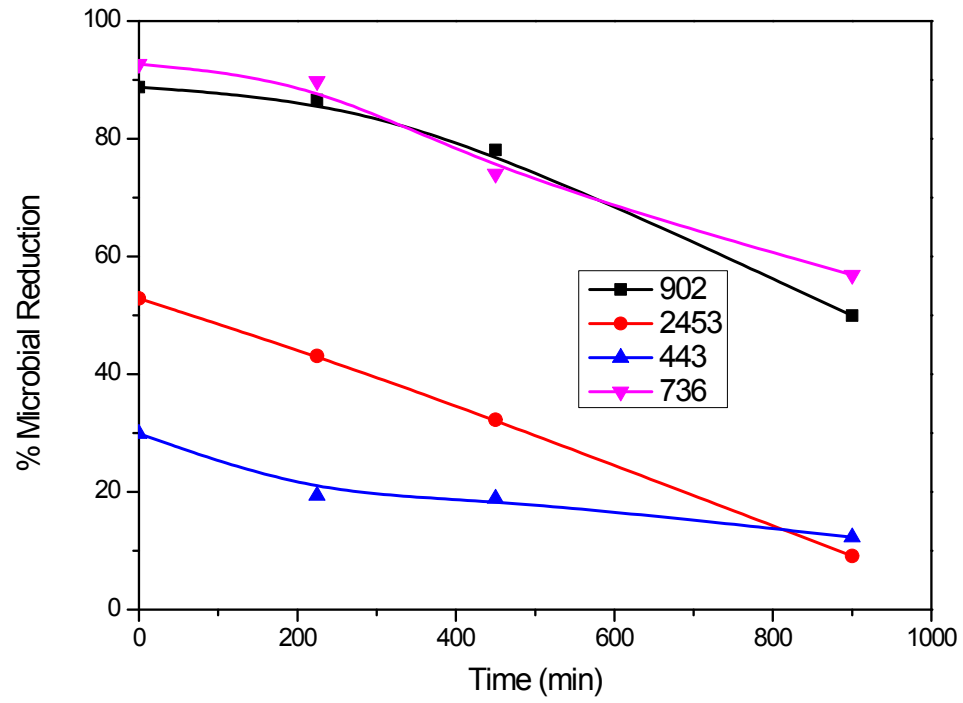

Fig. 3. Percentage microbial reduction as a function of time for 10% (o.w.f.) alum mordanted woolen yarn

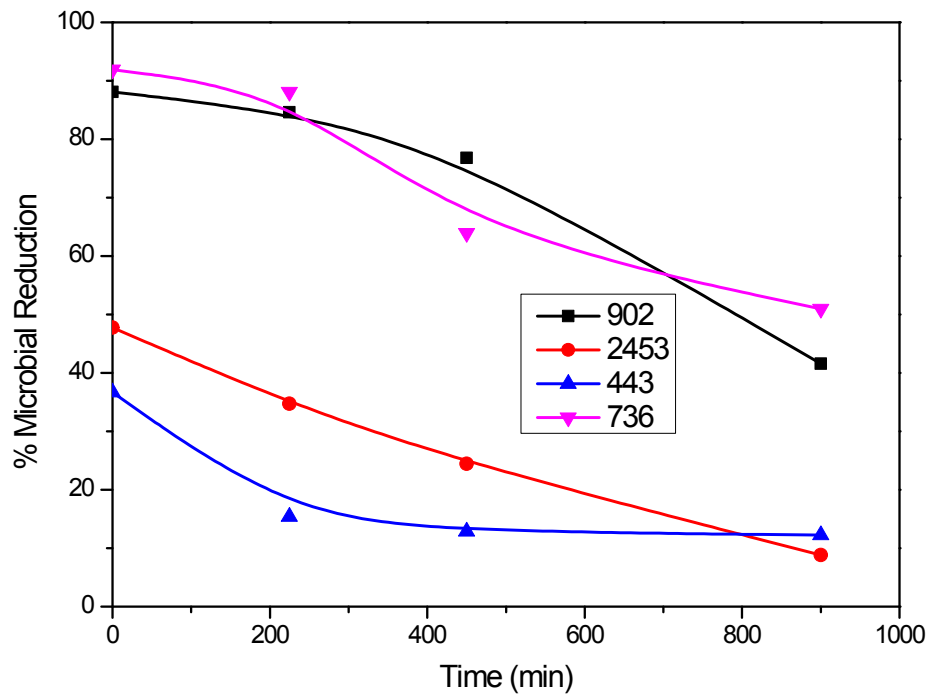

Fig. 4. Percentage microbial reduction as a function of time for 5% (o.w.f.) magnesium sulfate mordanted woolen yarn

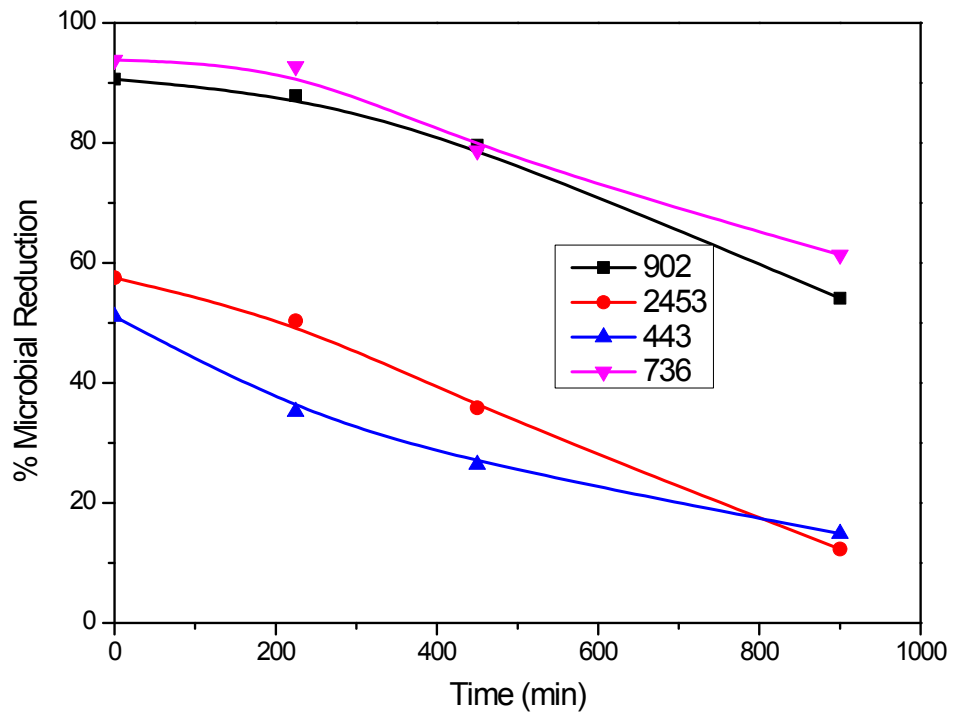

Supplement: c6ra02717b1.pdf [file c6ra02717b1.pdf]
